# Supplementary material for: Independent metal-binding features of recombinant metallothioneins convergently draw a step gradation between Zn- and Cu-thioneins
Source: Royal Society of Chemistry journal article supplement (doi:10.1039/b904953c), 2009-01-01
Supplement: b904953c.pdf [file b904953c.pdf]

| MT     | Ref. | Recombinant Zn-MT                                                                         | Recombinant Cd-MT                                                                         | Recombinant Cu-MT<br>[normal (↑) and low (↓) aeration]                                                                                                                                                                                 |
|--------|------|-------------------------------------------------------------------------------------------|-------------------------------------------------------------------------------------------|----------------------------------------------------------------------------------------------------------------------------------------------------------------------------------------------------------------------------------------|
| CeMT1  | *    | <br>Zn <sub>7</sub>                                                                       | <br><br>Cd <sub>6</sub> Zn <sub>1</sub>                                                   | <br>↑↓ M <sub>8</sub> > M <sub>9</sub> >> M <sub>5</sub> , M <sub>6</sub> (2.2 Zn, 4.6 Cu)                                                                                                                                             |
| MeMT   | 12   | <br>Zn <sub>7</sub>                                                                       | <br><br>Cd <sub>7</sub>                                                                   | <br>↑ M <sub>8</sub> > M <sub>9</sub> , M <sub>10</sub> (3.3 Zn, 4.6 Cu)                                                                                                                                                               |
| MT1    | 16   | <br>Zn <sub>7</sub>                                                                       | <br><br>Cd <sub>7</sub> >> Cd <sub>7</sub> Zn <sub>1</sub>                                | <br>↑ Cu <sub>7</sub> Zn <sub>3</sub> (2.4 Zn, 7.2 Cu)                                                                                                                                                                                 |
| HpCdMT | *    | <br>Zn <sub>6</sub> >> Zn <sub>5</sub> , Zn <sub>4</sub> , Zn <sub>3</sub>                | <br><br>Cd <sub>6</sub> >> Cd <sub>6</sub> Zn <sub>1</sub> , Cd <sub>5</sub>              | <br>↑ M <sub>5</sub> > M <sub>4</sub> , M <sub>6</sub> > M <sub>7</sub> , M <sub>8</sub> , M <sub>3</sub> (2.6 Zn, 1.9 Cu)<br>↓ M <sub>10</sub> > M <sub>11</sub> , M <sub>12</sub> , M <sub>8</sub> > M <sub>9</sub> (0.8 Zn, 8.3 Cu) |
| TpyMT1 | 17   | <br>Zn <sub>11</sub> >> Zn <sub>11</sub> S <sub>1</sub> , Zn <sub>10</sub>                | <br><br>Cd <sub>11</sub> >> Cd <sub>11</sub> S <sub>1</sub>                               | <br>↑ M <sub>9</sub> > M <sub>10</sub> , M <sub>8</sub> > M <sub>11</sub> > M <sub>12</sub> (2.9 Zn, 5.3 Cu)<br>↓ M <sub>10</sub> (0.4 Zn, 7.3 Cu)                                                                                     |
| SpMTA  | *    | <br>Zn <sub>7</sub> >> Zn <sub>7</sub> S <sub>1</sub> , Zn <sub>3</sub> , Zn <sub>4</sub> | <br><br>Cd <sub>7</sub> > Cd <sub>6</sub> S <sub>2</sub> > Cd <sub>7</sub> S <sub>1</sub> | <br>↑ M <sub>8</sub> >> M <sub>4</sub> , M <sub>6</sub> (2.2 Zn, 5.0 Cu)<br>↓ M <sub>4</sub> , M <sub>8</sub> (3.0 Zn, 5.5 Cu)                                                                                                         |
| CkMT   | 18   | <br>Zn <sub>7</sub> >> Zn <sub>7</sub> S <sub>1</sub>                                     | <br><br>Cd <sub>7</sub> > Cd <sub>6</sub> S <sub>2</sub>                                  | <br>↑ Cu <sub>7</sub> Zn <sub>3</sub> (2.5 Zn, 7.4 Cu)                                                                                                                                                                                 |
| MTH    | 7    | <br>Zn <sub>6</sub> > Zn <sub>7</sub>                                                     | <br><br>Cd <sub>6</sub> > Zn <sub>6</sub>                                                 | <br>↑ M <sub>8</sub> >> M <sub>11</sub> > M <sub>9</sub> , M <sub>10</sub> (1.6 Zn, 10.8 Cu)                                                                                                                                           |
| CeMT2  | *    | <br>Zn <sub>6</sub> > Zn <sub>5</sub> > Zn <sub>4</sub> > Zn <sub>3</sub>                 | <br><br>Cd <sub>6</sub> >> Cd <sub>6</sub> S <sub>1</sub>                                 | <br>↑↓ M <sub>8</sub> > M <sub>9</sub> > M <sub>5</sub> , M <sub>6</sub> , M <sub>7</sub> (2.5 Zn, 4.3 Cu)                                                                                                                             |
